# Supplementary material for: Comprehensive Analysis of the Expression, Prognostic Value and Correlations with Immune Infiltration of PBX Family Members in Colorectal Cancer
Source: Research Square preprint supplement (doi:10.21203/rs.3.rs-892580/v1), 2021-09-20
Supplement: Supplementary file 1 [file 99cfc7f86d9dadf7b66e90dd.xlsx]

## Sheet: Sheet1
Supplementary table 4：Correlation analysis between PBX4 and markers of immune cells in TIMER.
Desceiption	Gene markers	COAD				READ
		None		Purity		None		Purity
		Cor	P	Cor	P	Cor	P	Cor	P
CD8+ T cell	CD8A	0.0303183	0.517492	0.0559196	0.260236	-0.00229158	0.976611	0.0872056	0.305189
	CD8B	-0.0776574	0.0969332	-0.0803993	0.105312	-0.182948	*	-0.0775404	0.36206
T cell (general)	CD3D	0.058882	0.208388	0.070301	0.156815	-0.026931	0.730267	0.0541646	0.524583
	CD3E	0.0822866	0.0785513	0.0850633	0.0865422	-0.00494127	0.949579	0.0935558	0.271211
	CD2	0.0361649	0.439911	0.0363202	0.464789	-0.102342	0.189299	-0.00820887	0.923235
B cell	CD19	0.210401	***	0.219199	***	0.0425245	0.586444	0.06387	0.453429
	CD79A	0.0862499	0.0651658	0.108215	*	-0.0711781	0.36177	0.0147733	0.862304
Monocyte	CD86	-0.0893359	0.0560945	-0.0831538	0.0938656	-0.157655	*	-0.0196891	0.817183
	CSF1R	-0.0566152	0.226464	-0.0486189	0.327726	-0.0344839	0.658847	0.105994	0.212343
TAM	CCL2	-0.193153	***	-0.17415	**	-0.201351	**	-0.108036	0.203627
	CD68	-0.064776	0.166379	-0.0753222	0.129254	-0.142129	0.0677926	-0.0418053	0.623433
	IL10	-0.0619692	0.185553	-0.0577753	0.244846	-0.0615607	0.430751	0.0475005	0.577316
M1 Macrophage	NOS2	0.142683	**	0.115762	*	0.0660099	0.397741	0.0542652	0.523812
	IRF5	0.0107613	0.818273	0.0229478	0.644239	-0.0203855	0.794127	-0.0204675	0.810089
	PTGS2	-0.0940661	*	-0.0942551	0.0574452	-0.0523916	0.502229	-0.0146509	0.863434
M2 Macrophage	CD163	-0.0940498	*	-0.086339	0.0819112	-0.0797778	0.306574	0.0436378	0.608281
	VSIG4	-0.113938	*	-0.111657	*	-0.0386132	0.621021	0.0836238	0.325539
	MS4A4A	-0.104278	*	-0.0958954	0.053248	-0.105317	0.176704	0.0323413	0.704107
Neutrophils	CEACAM8	0.126119	**	0.1021	*	0.353843	***	0.299615	***
	ITGAM	0.0105862	0.82118	0.00114573	0.981609	-0.0630218	0.419481	0.0420459	0.621434
	CCR7	0.0959122	*	0.0904816	0.0682383	-0.0552669	0.479036	-0.00019243	0.998218
Natural killer cell	KIR2DL1	0.053163	0.256194	0.0197176	0.691661	0.0758674	0.331301	0.123088	0.147379
	KIR2DL3	0.0334219	0.475534	0.0118144	0.812175	0.0521717	0.504414	0.110659	0.193053
	KIR2DL4	0.0774524	0.0978208	0.0893548	0.0717462	0.149929	0.0538535	0.176605	*
	KIR3DL1	0.0323254	0.490141	0.00986801	0.842676	0.0325016	0.67763	0.0954853	0.261763
	KIR3DL2	0.00770854	0.86932	0.0159237	0.748756	0.0358219	0.646814	0.115617	0.173734
	KIR3DL3	0.027951	0.550735	0.0170898	0.731043	0.0400945	0.608032	0.086066	0.311971
	KIR2DS4	0.00624096	0.894036	-0.0177405	0.72122	-0.013459	0.863355	0.0639067	0.453169
Dendritic cell	HLA-DPB1	0.040251	0.389978	0.0462573	0.351788	-0.0199658	0.798275	0.106234	0.211303
	HLA-DQB1	0.012629	0.787431	0.0329252	0.50757	0.109638	0.159532	0.14863	0.0796921
	HLA-DRA	-0.0336365	0.472558	-0.0161896	0.7446	-0.0585567	0.453228	0.0631125	0.458351
	HLA-DPA1	-0.0242047	0.605391	-0.0083311	0.866873	-0.0857252	0.271826	0.0469353	0.581433
	CD1C	-0.0701093	0.134095	-0.0616268	0.214742	0.0328734	0.674152	0.0967703	0.255368
	NRP1	-0.118305	*	-0.130594	*	-0.220494	**	-0.146535	0.0840655
	ITGAX	0.107595	*	0.0941772	0.0576758	0.0491857	0.528767	0.125617	0.139051
Th1	TBX21	0.0915584	0.050207	0.0749418	0.131205	0.0861153	0.269947	0.151402	0.0741538
	STAT4	0.0214891	0.646342	0.0196178	0.693021	0.0043405	0.955704	0.0782401	0.357734
	STAT1	-0.00029578	0.994963	0.00419456	0.93274	-0.250496	**	-0.158151	0.0620708
	IFNG	0.0593317	0.205012	0.0584039	0.239741	-0.177497	*	-0.0590598	0.488219
	TNF	0.0610043	0.192508	0.0546774	0.271112	0.0572922	0.463054	0.0884345	0.298404
Th2	GATA3	0.058226	0.213595	0.0390168	0.432446	0.017602	0.821733	0.0732501	0.389288
	STAT6	0.15676	**	0.156045	*	0.0939103	0.228541	0.194901	*
	STAT5A	0.117768	*	0.0926075	0.0619838	0.0277443	0.722451	0.0462094	0.587297
	IL13	0.00443534	0.924584	0.023629	0.634575	0.0199798	0.798335	0.0904034	0.288121
Tfh	BCL6	0.0827834	0.0767597	0.0711146	0.152063	-0.0512793	0.511357	-0.0574665	0.49959
	IL21	-0.0330681	0.48022	-0.0179587	0.717937	-0.105587	0.175768	-0.146977	0.0831153
Th17	STAT3	-0.116687	*	-0.148439	*	-0.199772	*	-0.15704	0.0639457
	IL17A	0.0572908	0.221054	0.0550892	0.267514	0.0510191	0.513889	0.0938276	0.270173
Treg	FOXP3	0.081668	0.0808288	0.0851446	0.0862407	-0.0217025	0.781152	0.0730533	0.390566
	CCR8	-0.0195467	0.676522	-0.0153394	0.757682	-0.126476	0.104431	-0.0800888	0.34689
	STAT5B	-0.0331737	0.478675	-0.0506402	0.307998	-0.19575	*	-0.149391	0.0781495
	TGFB1	0.0264251	0.572568	0.00311664	0.949998	0.0638587	0.413324	0.156218	0.065363
T cell exhaustion	PDCD1	0.164074	***	0.173876	**	0.0923992	0.236141	0.18182	*
	CTLA4	0.118833	*	0.109201	*	0.00649173	0.933785	0.103225	0.224579
	LAG3	0.152118	**	0.138275	**	0.0523155	0.50285	0.127948	0.131822
	HAVCR1	-0.0482585	0.30275	-0.0120437	0.808599	-0.0104583	0.893615	-0.0645797	0.448416
	GZMB	0.016684	0.721664	0.0285759	0.565246	0.0421444	0.58944	0.0969189	0.254299
