# Supplementary material for: Comprehensive Analysis of the Expression, Prognostic Value and Correlations with Immune Infiltration of PBX Family Members in Colorectal Cancer
Source: Research Square preprint supplement (doi:10.21203/rs.3.rs-892580/v1), 2021-09-20
Supplement: Supplementary file 2 [file dce906f796d31c6d89c16a48.xlsx]

## Sheet: Sheet1
Supplementary table 2：Correlation analysis between PBX2 and markers of immune cells in TIMER.
Desceiption	Gene markers	COAD				READ
		None		Purity		None		Purity
		Cor	P	Cor	P	Cor	P	Cor	P
CD8+ T cell	CD8A	0.0515785	0.27066	0.083836	0.0911941	0.0971477	0.212844	0.0693709	0.414941
	CD8B	0.106725	*	0.122622	*	0.190925	*	0.128801	0.12925
T cell (general)	CD3D	0.0159992	0.732643	0.0490238	0.323709	-0.00313109	0.968042	-0.0120968	0.88707
	CD3E	0.103664	*	0.14556	**	0.0838625	0.282408	0.0658809	0.438844
	CD2	0.0718733	0.124522	0.122051	*	0.129445	0.0964561	0.121314	0.153187
B cell	CD19	0.138278	**	0.183873	***	-0.0814102	0.297086	-0.0650508	0.445105
	CD79A	0.135776	**	0.180515	***	0.0717946	0.357619	0.0802125	0.345715
Monocyte	CD86	0.12055	*	0.152472	**	0.205916	*	0.147646	0.081723
	CSF1R	0.204233	***	0.227573	***	0.141382	0.069263	0.0708972	0.404731
TAM	CCL2	0.187828	***	0.189	***	0.259332	**	0.23235	**
	CD68	0.127398	**	0.169122	**	0.187001	*	0.122276	0.149936
	IL10	0.0543222	0.245957	0.0781139	0.115616	0.0538206	0.491018	0.00233545	0.978152
M1 Macrophage	NOS2	-0.193215	***	-0.161738	**	0.0249661	0.749266	0.0695502	0.413733
	IRF5	0.0965165	*	0.0923371	0.062752	-0.0438549	0.574411	-0.066655	0.433476
	PTGS2	0.0433061	0.355126	0.0281272	0.571522	0.149286	0.054969	0.123151	0.147026
M2 Macrophage	CD163	0.18028	***	0.196786	***	0.213679	**	0.141423	0.0955499
	VSIG4	0.0778071	0.0962796	0.0921166	0.0633843	0.0165212	0.832514	-0.0594214	0.485094
	MS4A4A	0.0841955	0.0718489	0.108782	*	0.139865	0.0723248	0.0764208	0.369049
Neutrophils	CEACAM8	-0.352656	***	-0.362182	***	-0.374039	***	-0.339611	***
	ITGAM	0.123016	**	0.148503	**	0.13439	0.0843077	0.0792635	0.351466
	CCR7	0.200097	***	0.238993	***	0.0788386	0.312317	0.100116	0.23891
Natural killer cell	KIR2DL1	-0.0933102	*	-0.0874537	0.0780249	-0.0556414	0.47645	-0.0847148	0.319657
	KIR2DL3	-0.0407521	0.38424	0.00951102	0.848297	-0.0727435	0.351654	-0.0808771	0.342149
	KIR2DL4	-0.121668	**	-0.0912564	0.065885	0.0097487	0.900795	-0.00478123	0.95529
	KIR3DL1	-0.0268116	0.5671	0.0106242	0.830794	-0.0487088	0.533155	-0.085298	0.316325
	KIR3DL2	0.0570675	0.222862	0.0664791	0.180727	-0.120643	0.121554	-0.18864	*
	KIR3DL3	-0.0317906	0.497353	-0.00079384	0.987262	-0.0708579	0.36431	-0.0899242	0.290694
	KIR2DS4	0.0680833	0.145737	0.0814247	0.100932	0.0358556	0.646505	0.0149209	0.8611
Dendritic cell	HLA-DPB1	-0.00531086	0.909721	0.0379972	0.444417	-0.0148474	0.84927	-0.074256	0.382796
	HLA-DQB1	-0.0516	0.270348	-0.00825812	0.868029	-0.0646589	0.407486	-0.0705998	0.406709
	HLA-DRA	0.0050879	0.913496	0.0386572	0.436542	-0.0113871	0.884118	-0.0744878	0.381309
	HLA-DPA1	0.0597892	0.201535	0.0988951	*	0.0702652	0.367973	0.0135575	0.873539
	CD1C	0.111206	*	0.134715	**	-0.00849872	0.913462	-0.00544489	0.949092
	NRP1	0.347735	***	0.373587	***	0.406492	***	0.393125	***
	ITGAX	0.207019	***	0.243562	***	0.134382	0.084326	0.122543	0.149044
Th1	TBX21	0.1565	**	0.213638	***	0.1158	0.137357	0.110163	0.19507
	STAT4	0.108108	*	0.136375	**	0.167808	*	0.146137	0.0849178
	STAT1	0.219623	***	0.244917	***	0.3759	***	0.304139	***
	IFNG	0.014486	0.757182	0.0358031	0.471335	0.230698	**	0.164227	0.0525107
	TNF	0.10823	*	0.116053	*	0.204195	**	0.186005	*
Th2	GATA3	0.18802	***	0.239557	***	0.182725	*	0.139984	0.0989973
	STAT6	0.304553	***	0.308498	***	0.277615	***	0.195478	*
	STAT5A	0.106673	*	0.124439	*	0.0140997	0.856777	0.0118782	0.889099
	IL13	0.0521354	0.265513	0.0643311	0.195258	-0.0728036	0.351255	-0.0796155	0.349756
Tfh	BCL6	0.314639	***	0.345812	***	0.398632	***	0.397704	***
	IL21	0.113601	*	0.119265	*	0.0710638	0.362914	0.0658291	0.439666
Th17	STAT3	0.290938	***	0.301862	***	0.326477	***	0.324563	***
	IL17A	-0.0279868	0.550224	-0.0146217	0.768689	0.0315955	0.686136	0.0300697	0.724329
Treg	FOXP3	0.19268	***	0.231023	***	0.14831	0.0565894	0.118147	0.164262
	CCR8	0.270603	***	0.295835	***	0.262367	**	0.247927	**
	STAT5B	0.4792	***	0.488627	***	0.404073	***	0.397236	***
	TGFB1	0.160961	**	0.19333	***	0.0228148	0.77024	-0.0237432	0.780411
T cell exhaustion	PDCD1	0.103957	*	0.146812	**	0.128994	0.0976305	0.094085	0.268501
	CTLA4	0.140845	**	0.204784	***	0.258519	**	0.224924	**
	LAG3	0.0569938	0.22337	0.108492	*	0.0417955	0.592528	0.0116507	0.891209
	HAVCR1	0.0544633	0.244731	0.0567256	0.253539	0.045337	0.561908	0.0831871	0.328493
	GZMB	0.0284058	0.544129	0.0438268	0.377687	0.0251733	0.747255	0.035184	0.679473
